# Supplementary material
Source: PubMed Central journal article supplement (PMC3617406)

Supporting Information for

Structure Activity Relationship for FDA  
Approved Drugs as Inhibitors of the Human  
Sodium Taurocholate Co-transporting  
Polypeptide (NTCP)

*Zhongqi Dong<sup>†</sup>, Sean Ekins<sup>†,‡</sup>, and James E. Polli<sup>†,\*</sup>*

<sup>†</sup>Department of Pharmaceutical Sciences, School of Pharmacy, University of Maryland,  
20 Penn Street, Baltimore, Maryland 21201.

<sup>‡</sup> Collaborations in Chemistry, 5616 Hilltop Needmore Road, Fuquay Varina, NC 27526

USA.

\*Author to whom correspondence should be addressed: University of Maryland School  
of Pharmacy, Department of Pharmaceutical Sciences, HSF2 room 623, Baltimore, MD  
21201. Tel: 410-706-8292. Fax: 410-706-5017. E-mail: [jpolti@rx.umaryland.edu](mailto:jpolti@rx.umaryland.edu).

**Table S1.** List of forty-five retrieved compounds from a SCUT database search, using the qualitative common feature pharmacophore with ezetimibe shape restriction.

| <b>Compound</b> | <b>Fit Value</b> | <b>Indication</b>                                                                                                                    |
|-----------------|------------------|--------------------------------------------------------------------------------------------------------------------------------------|
| Irbesartan      | 2.4810           | Angiotensin II receptor antagonist                                                                                                   |
| Valsartan       | 2.3137           | Angiotensin II receptor antagonist                                                                                                   |
| Losartan        | 2.2480           | Angiotensin II antagonist                                                                                                            |
| Ropinirole      | 2.2391           | Dopamine agonist                                                                                                                     |
| Sulfinpyrazone  | 2.1336           | Inhibits renal tubular absorption of uric acid                                                                                       |
| Meperidine      | 2.0869           | Narcotic analgesic                                                                                                                   |
| Bortezomib      | 1.9219           | Proteasome inhibitor                                                                                                                 |
| Eletriptan      | 1.8245           | Selective serotonin B1/D agonist                                                                                                     |
| Haloperidol     | 1.8201           | Antipsychotic, neuroleptic                                                                                                           |
| Fenofibrate     | 1.8035           | Inhibits triglyceride synthesis                                                                                                      |
| Tolazamide      | 1.6502           | Stimulates release of insulin from the pancreas, increases insulin sensitivity at peripheral sites, decreases hepatic glucose output |
| Cephradine      | 1.6286           | Inhibits bacterial cell wall biosynthesis                                                                                            |
| Cefaclor        | 1.5905           | Inhibits bacterial cell wall biosynthesis                                                                                            |
| Ramipril        | 1.5681           | ACE inhibitor                                                                                                                        |
| Eprosartan      | 1.5642           | Angiotensin II receptor antagonist                                                                                                   |
| Cephalexin      | 1.5446           | Inhibits bacterial cell wall biosynthesis                                                                                            |
| Loracarbef      | 1.4501           | Antibacterial, inhibits cell wall                                                                                                    |

|                                 |        |                                                                                                             |
|---------------------------------|--------|-------------------------------------------------------------------------------------------------------------|
|                                 |        | synthesis                                                                                                   |
| Indomethacin                    | 1.3652 | Inhibits prostaglandin synthesis                                                                            |
| Loperamide                      | 1.2300 | Slows intestinal motility                                                                                   |
| Propafenone                     | 1.0952 | Class 1C antiarrhythmic                                                                                     |
| Paliperidone                    | 1.0949 | Antagonizes dopamine receptors                                                                              |
| Ezetimibe                       | 1.0896 | HMG-CoA reductase inhibitor                                                                                 |
| Nafcillin                       | 1.0087 | Bactericidal, inhibits cell wall synthesis                                                                  |
| Bumetanide                      | 0.9628 | Loop diuretic inhibits reabsorption of Na and Cl in the ascending loop of Henle and the distal renal tubule |
| Trandolapril                    | 0.9525 | ACE inhibitor                                                                                               |
| Tiagabine                       | 0.8866 | GABA inhibitor                                                                                              |
| Permethrin                      | 0.8224 | Pediculicide                                                                                                |
| Nateglinide                     | 0.8063 | Increases pancreatic release of insulin                                                                     |
| Cocaine_metabolite_cocaethylene | 0.7875 |                                                                                                             |
| Penicillin V                    | 0.7691 | Bactericidal                                                                                                |
| Quinapril                       | 0.7147 | ACE inhibitor                                                                                               |
| Cefadroxil                      | 0.6845 | Inhibits bacterial cell wall biosynthesis                                                                   |
| Oseltamivir                     | 0.6812 | Inhibits viral neuroamidase                                                                                 |
| Raloxifene                      | 0.5787 | Partial antagonist of estrogen that behaves like estrogen                                                   |
| Benazepril                      | 0.5356 | Angiotensin converting enzyme inhibitor                                                                     |
| Aztreonam                       | 0.5148 | Inhibits bacterial cell wall biosynthesis                                                                   |
| Loratadine                      | 0.4274 | Antihistamine                                                                                               |
| Amoxicillin                     | 0.0956 | $\beta$ -lactam antibiotic, inhibits                                                                        |

|                  |        |                                           |
|------------------|--------|-------------------------------------------|
|                  |        | bacterial cell wall synthesis             |
| Thiethylperazine | 0.0612 | Antidopaminergic, antiemetic              |
| Quinidine        | 0.0508 | Class 1A antiarrhythmic                   |
| Alfuzosin        | 0.0267 | A1-adrenoreceptor antagonist              |
| Perindopril      | 0.0178 | ACE inhibitor                             |
| Enalapril        | 0.0048 | ACE inhibitor                             |
| Cefdinir         | 0.0020 | Inhibits bacterial cell wall biosynthesis |
| Candesartan      | 0.0012 | Angiotensin II antagonist                 |

**Table S2.** List of eighty-five retrieved compounds from a CDD database search, using the qualitative common feature pharmacophore with ezetimibe shape restriction.

| <b>Compound</b>                | <b>Fit Value</b> | <b>Indication</b>    |
|--------------------------------|------------------|----------------------|
| Phthalylsulfamethizole         | 2.7541           | Antibiotic           |
| Yohimbine                      | 2.5767           | Erectile dysfunction |
| Nateglinide                    | 2.4916           | Antidiabetic         |
| Irbesartan                     | 2.4810           | Antihypertensive     |
| Perindopril                    | 2.3501           | Antihypertensive     |
| Losartan                       | 2.2480           | Antihypertensive     |
| Ropinirole                     | 2.2391           | Antiparkinsonian     |
| Haloperidol lactate            | 2.1229           | Antipsychotic        |
| Sulfinpyrazone                 | 2.1049           | Antiurolithic        |
| Bortezomib                     | 2.0127           | Antineoplastic       |
| Bensulide                      | 1.9980           | Antiinflammatory     |
| TetradecylSulfate              | 1.9479           | Antiseptic           |
| Ezetimibe                      | 1.9055           | Antihyperlipidemic   |
| Sodium dodecylbenzenesulfonate | 1.8821           | Antiseptic           |
| Olmesartan                     | 1.8402           | Antihypertensive     |
| Haloperidol                    | 1.8201           | Antispasmodic        |
| Fenofibrate                    | 1.8035           | Antihyperlipidemic   |
| Valsartan                      | 1.7235           | Antihypertensive     |
| Tolazamide                     | 1.6502           | Antidiabetic         |
| Cephradine                     | 1.6286           | Antibiotic           |
| Cefaclor                       | 1.5905           | Antibiotic           |

|                               |        |                    |
|-------------------------------|--------|--------------------|
| Ramipril                      | 1.5681 | Antihypertensive   |
| Tetrabenazine                 | 1.5481 | Antipsychotic      |
| Cephalexin                    | 1.5446 | Antibiotic         |
| Salicylic anhydride diacetate | 1.5326 | Antiinflammatory   |
| Carbenicillin                 | 1.5318 | Antibiotic         |
| Quinidine gluconate           | 1.5274 | Antimalarial       |
| Pipazethate                   | 1.5217 | Antitussive        |
| Amprotopine                   | 1.4779 | Antihypertensive   |
| Diphenoxylate                 | 1.4643 | Antispasmodic      |
| Narceine                      | 1.4581 | Analgesic          |
| Cyclomethycaine               | 1.4461 | Analgesic          |
| Piminodine                    | 1.4187 | Analgesic          |
| Ticarcillin                   | 1.3802 | Antibiotic         |
| Indomethacin                  | 1.3652 | Antiinflammatory   |
| Loperamide                    | 1.2279 | Antidiarrheal      |
| Temocillin                    | 1.2096 | Antibacterial      |
| Almecillin                    | 1.1761 | Antibiotic         |
| Anileridine                   | 1.1586 | Analgesic          |
| Propafenone                   | 1.0952 | Antiarrhythmic     |
| Eletriptan                    | 1.0687 | Antimigraine       |
| Penicillin V                  | 1.0495 | Antibiotic         |
| Pheneticillin                 | 1.0376 | Antibiotic         |
| Ilomastat                     | 1.0229 | Ophthalmic         |
| Aztreonam                     | 0.9810 | Antibiotic         |
| Bumetanide                    | 0.9628 | Diuretic           |
| Triparanol                    | 0.9571 | Antihyperlipidemic |

|                         |        |                                        |
|-------------------------|--------|----------------------------------------|
| Gimatecan               | 0.9274 | Antineoplastic                         |
| Tiagabine               | 0.8866 | Anticonvulsant                         |
| Permethrin              | 0.8224 | Dermatologic                           |
| Nafcillin               | 0.8223 | Antibiotic                             |
| Arbutamine              | 0.7915 | Antihypotensive                        |
| Penicillin G            | 0.7781 | Antibacterial                          |
| Penicillin V            | 0.7691 | Antibiotic                             |
| Azlocillin              | 0.7484 | Antibiotic                             |
| Pyrethrins              | 0.7174 | Insecticide                            |
| Quinapril               | 0.7147 | Antihypertensive                       |
| Nylidrin                | 0.7012 | Vasodilator                            |
| Cefadroxil              | 0.6845 | Antibiotic                             |
| Clomiphene Citrate      | 0.6720 | Selective estrogen receptor modulators |
| Hetacillin              | 0.6530 | Antibacterial                          |
| Penicillin G sodium     | 0.6105 | Antibiotic                             |
| Oseltamivir             | 0.6046 | Antiviral                              |
| Raloxifene              | 0.5787 | Bone resorption inhibitor              |
| Omalizumab              | 0.5649 | Antihistaminic, antihypertensive       |
| Benazepril              | 0.5356 | Antihypertensive                       |
| Loratadine              | 0.4274 | Antihistaminic                         |
| Penicillin G benzathine | 0.3545 | Antibiotic                             |
| Cefamandole             | 0.2818 | Antibiotic                             |
| Oxacillin               | 0.2225 | Antibiotic                             |
| Enazepril               | 0.2036 | Antihypertensive                       |
| Piperacetazine          | 0.1774 | Antipsychotic                          |
| Eprosartan              | 0.1724 | Antihypertensive                       |

|                     |        |                  |
|---------------------|--------|------------------|
| Methicillin         | 0.1237 | Antibiotic       |
| Estradiol cypionate | 0.1118 | Estrogen         |
| Colchicine          | 0.0932 | Antigout agent   |
| Thiethylperazine    | 0.0612 | Antiemetic       |
| Trandolapril        | 0.0608 | Antihypertensive |
| Alfuzosin           | 0.0267 | Antihypertensive |
| Perindopril         | 0.0178 | Antihypertensive |
| Enalapril           | 0.0048 | Antihypertensive |
| Chlordantoin        | 0.0034 | Antifungal       |
| Candesartan         | 0.0012 | Antihypertensive |
| Indigosol           | 0.0008 | Unclassified     |
| Finasteride         | 0.0003 | Urologic         |



**Table S3.** Bayesian model leave-one-out cross-validation results. This model was built using 50 samples, and validated using a leave-one-out cross-validation. A ROC plot was generated, and the area under the curve (XV ROC AUC) calculated. Best Split was calculated by picking the split that minimized the sum of the percent misclassified for category members and for category nonmembers, using the cross-validated score for each sample. Using that split, a contingency table was constructed, containing the number of true positives (TP), false negatives (FN), false positives (FP), and true negatives (TN).

| <b>Output</b>                        | <b>XV ROC AUC</b> | <b>Best Split</b> | <b>TP/FN<br/>FP/TN</b> | <b># in Category</b> |
|--------------------------------------|-------------------|-------------------|------------------------|----------------------|
| NTCP N50 with sig cutoff<br>Bayesian | 0.769             | -0.956            | 23/5<br>6/16           | 28                   |

**Table S4.** Bayesian model enrichment results. This table shows the output name, the percentage of samples that are in that particular category, the number of category members, and the percentage of true members found. Percentages that are less than 100% are in bold.

| <b>Output</b>                     | <b>Category %</b> | <b>1%</b> | <b>5%</b> | <b>10%</b> | <b>25%</b> | <b>50%</b> | <b>75%</b> | <b>90%</b> | <b>95%</b> | <b>99%</b> |
|-----------------------------------|-------------------|-----------|-----------|------------|------------|------------|------------|------------|------------|------------|
| NTCP N50 with sig cutoff Bayesian | 56%               | 0%        | 7.1%      | 14.3%      | 35.7%      | 71.4%      | 89.3%      | 92.9%      | 100%       | 100%       |

**Table S5.** Bayesian model percentile results. This table shows, for each model, the cutoff needed to capture a particular percentage of the good samples. For each cutoff, it shows below the estimated percentages of false positives and true negatives for the non-good samples. This table is designed to help you pick the cutoff value that best balances your desire to capture as many good samples as possible, while keeping the number of false positives at a minimum. Cutoff which lead to 10% or greater false positives are displayed in bold for ease of identification.

| <b>Model Name</b>                             | <b>99%</b>            | <b>95%</b>            | <b>90%</b>            | <b>70%</b>            | <b>50%</b>            | <b>30%</b>          | <b>10%</b>          | <b>5%</b>           | <b>1%</b>            |
|-----------------------------------------------|-----------------------|-----------------------|-----------------------|-----------------------|-----------------------|---------------------|---------------------|---------------------|----------------------|
| NTCP<br>N50<br>with sig<br>cutoff<br>Bayesian | -7.410<br>90%/10<br>% | -4.709<br>74%/26<br>% | -3.242<br>63%/37<br>% | -1.622<br>48%/52<br>% | -1.622<br>22%/78<br>% | 4.938<br>7%/93<br>% | 6.558<br>3%/97<br>% | 8.025<br>2%/98<br>% | 10.726<br>1%/99<br>% |

**Table S6.** Bayesian model category statistics results. This table shows, for each category, statistics derived from the cross-validated predictions of the model built for that category as applied to members of that category and non-members of that category. For each group, the number of members/nonmembers (N) is given; the mean prediction for each subset (Mean); and the estimate standard deviation of the predictions for each subset (StdDev).

| <b>Output</b>                     | <b>Category<br/>N</b> | <b>Category<br/>Mean<br/>(<math>\pm</math>StdDev)</b> | <b>Noncategory<br/>N</b> | <b>Noncategory<br/>Mean<br/>(<math>\pm</math>StdDev)</b> |
|-----------------------------------|-----------------------|-------------------------------------------------------|--------------------------|----------------------------------------------------------|
| NTCP N50 with sig cutoff Bayesian | 28                    | 1.66 ( $\pm$ 3.86)                                    | 22                       | -1.89 ( $\pm$ 4.43)                                      |

**Table S7.** External testing of Bayesian Model using different sized leave out groups.

| <b>Leave out 10% 100 x</b> |              |              |             |             |             |
|----------------------------|--------------|--------------|-------------|-------------|-------------|
|                            | External_ROC | Internal_ROC | Concordance | Specificity | Sensitivity |
| Mean                       | 0.71         | 0.73         | 60.36       | 59.65       | 56.15       |
| STDEV                      | 0.19         | 0.059        | 26.27       | 37.99       | 34.37       |
| <b>Leave out 30% 100x</b>  |              |              |             |             |             |
|                            | External_ROC | Internal_ROC | Concordance | Specificity | Sensitivity |
| Mean                       | 0.66         | 0.70         | 58.09       | 67.15       | 50.19       |
| STDEV                      | 0.11         | 0.10         | 10.21       | 23.73       | 23.12       |
| <b>Leave out 50% 100x</b>  |              |              |             |             |             |
|                            | External_ROC | Internal_ROC | Concordance | Specificity | Sensitivity |
| Mean                       | 0.60         | 0.69         | 54.18       | 64.40       | 45.81       |
| STDEV                      | 0.08         | 0.14         | 8.54        | 23.52       | 22.80       |

**Table S8.** Comparison of 72 drugs in terms of NTCP and ASBT inhibition, from screening studies (i.e. single concentration studies). For each NTCP and ASBT, the percent taurocholate uptake compared to no-drug control was listed. Compounds are listed in alphabetical order.

| <b>Compounds</b>    | <b>Percent taurocholate Uptake by NTCP</b> | <b>Percent taurocholate Uptake by ASBT</b> |
|---------------------|--------------------------------------------|--------------------------------------------|
| Abacavir            | 94.9 $\pm$ 4.4                             | 95.8 $\pm$ 5.9                             |
| Acarbose            | 99.7 $\pm$ 4.9                             | 106 $\pm$ 7                                |
| Aztreonam           | 104 $\pm$ 4                                | 95.7 $\pm$ 7.5                             |
| Bendroflumethiazide | 27.6 $\pm$ 0.7                             | 71.8 $\pm$ 1.2                             |
| Bortezomib          | 107 $\pm$ 4                                | 92.7 $\pm$ 1.7                             |
| Budesonide          | 79.3 $\pm$ 6.4                             | 48.9 $\pm$ 6.2                             |
| Candesartan         | 68.0 $\pm$ 7.2                             | 50.8 $\pm$ 9.9                             |
| Cefaclor            | 99.1 $\pm$ 6.2                             | 96.7 $\pm$ 0.4                             |
| Cerivastatin        | 68.6 $\pm$ 7.4                             | 77.0 $\pm$ 8.9                             |
| Chloroquine         | 83.0 $\pm$ 4.5                             | 105 $\pm$ 3                                |
| Chlorpromazine      | 91.8 $\pm$ 3.0                             | 43.9 $\pm$ 2.8                             |
| Cimetidine          | 82.9 $\pm$ 2.9                             | 76.0 $\pm$ 4.4                             |
| Cyclosporine A      | 24.0 $\pm$ 1.9                             | 55.5 $\pm$ 4.3                             |
| Daunorubicin        | 107 $\pm$ 3                                | 153 $\pm$ 9                                |
| Dibucaine           | 100 $\pm$ 1                                | 56.6 $\pm$ 0.6                             |
| Diltiazem           | 87.5 $\pm$ 5.9                             | 78.3 $\pm$ 1.5                             |
| Doxazosin           | 70.8 $\pm$ 3.7                             | 57.2 $\pm$ 7.5                             |
| Econazole           | 92.3 $\pm$ 4.5                             | 36.3 $\pm$ 4.8                             |

|                    |                |                |
|--------------------|----------------|----------------|
| Eletriptan         | 104 $\pm$ 8    | 68.3 $\pm$ 8.2 |
| Enalapril          | 111 $\pm$ 4    | 71.1 $\pm$ 8.4 |
| Eprosartan         | 99.9 $\pm$ 0.7 | 78.9 $\pm$ 9.0 |
| Ethosuximide       | 88.2 $\pm$ 3.8 | 82.6 $\pm$ 2.4 |
| Ezetimibe          | 62.5 $\pm$ 1.4 | 15.3 $\pm$ 2.0 |
| Famotidine         | 84.9 $\pm$ 3.6 | 97.2 $\pm$ 15  |
| Fenofibrate        | 76.3 $\pm$ 6.0 | 64.7 $\pm$ 6.1 |
| Formoterol         | 111 $\pm$ 2    | 73.4 $\pm$ 8.1 |
| Furosemide         | 81.6 $\pm$ 6.9 | 113 $\pm$ 9    |
| Imatinib           | 90.7 $\pm$ 1.6 | 73.0 $\pm$ 3.5 |
| Indomethacin       | 68.4 $\pm$ 2.5 | 32.5 $\pm$ 5.5 |
| Irbesartan         | 15.9 $\pm$ 1.6 | 67.0 $\pm$ 6.2 |
| Isradipine         | 59.3 $\pm$ 3.2 | 22.1 $\pm$ 2.1 |
| Itraconazole       | 81.8 $\pm$ 5.6 | 77.6 $\pm$ 8.6 |
| Ketoconazole       | 59.1 $\pm$ 3.0 | 48.8 $\pm$ 10  |
| Ketoprofen         | 84.6 $\pm$ 6.1 | 88.2 $\pm$ 8.6 |
| Losartan           | 60.7 $\pm$ 2.0 | 67.9 $\pm$ 9.5 |
| Lovastatin         | 74.7 $\pm$ 3.2 | 25.4 $\pm$ 1.7 |
| Methylprednisolone | 79.5 $\pm$ 3.5 | 101 $\pm$ 9    |
| Metronidazole      | 84.3 $\pm$ 2.7 | 77.3 $\pm$ 7.7 |
| Miconazole         | 94.6 $\pm$ 2.6 | 65.1 $\pm$ 6.4 |
| Nafcillin          | 96.7 $\pm$ 5.6 | 113 $\pm$ 9    |
| Naproxen           | 76.0 $\pm$ 5.2 | 67.5 $\pm$ 2.1 |
| Nateglinide        | 62.0 $\pm$ 1.4 | 55.2 $\pm$ 4.8 |
| Nefazodone         | 60.8 $\pm$ 1.9 | 34.0 $\pm$ 2.4 |
| Nicardipine        | 81.8 $\pm$ 6.5 | 68.4 $\pm$ 0.5 |

|                  |          |          |
|------------------|----------|----------|
| Nifedipine       | 67.7±5.8 | 57.8±8.4 |
| Nimodipine       | 55.9±1.6 | 32.5±1.1 |
| Nitrendipine     | 67.7±1.6 | 50.5±4.9 |
| Olmesartan       | 86.0±5.5 | 94.2±2.0 |
| Omeprazole       | 105±6    | 61±5     |
| Oseltamivir      | 102±9    | 94.1±0.3 |
| Oxiconazole      | 99.5±2.6 | 74.2±7.3 |
| Prednisolone     | 83.0±8.4 | 57.7±7.5 |
| Probenecid       | 86.8±3.3 | 86.7±4.3 |
| Procainamide HCl | 84.8±6.7 | 124.2±13 |
| Prochlorperazine | 81.0±2.5 | 31.6±3.2 |
| Propafenone HCl  | 85.4±3.8 | 43.5±9.1 |
| Quinine          | 95.6±1.8 | 78.3±8.6 |
| Raloxifene HCl   | 90.5±4.6 | 66.7±2.9 |
| Reserpine        | 83.8±8.3 | 57.0±3.2 |
| Ritonavir        | 27.0±1.2 | 42.1±5.2 |
| Ropinirole       | 133±4    | 33.7±7.8 |
| Rosuvastatin     | 59.1±3.0 | 71.3±4.2 |
| Simvastatin      | 47.6±4.2 | 60.1±4.2 |
| Sulconazole      | 86.7±7.2 | 64.2±0.4 |
| Sulfanilamide    | 78.4±3.4 | 74.7±2.3 |
| Sulfinpyrazone   | 96.1±3.2 | 89.2±7.0 |
| Thiothixene      | 99.2±1.0 | 99.4±7.9 |
| Tioconazole      | 84.3±5.1 | 27.0±4.4 |
| Triamterene      | 85.7±4.3 | 62.8±0.6 |
| Valsartan        | 101±3    | 95.0±6.1 |



|           |                    |                       |
|-----------|--------------------|-----------------------|
| Warfarin  | 102 <sub>±</sub> 2 | 59.7 <sub>±</sub> 6.8 |
| Yohimbine | 108 <sub>±</sub> 4 | 85.5 <sub>±</sub> 11  |

**Table S9.** Results from drug cytotoxicity testing. Cytotoxicity is shown in terms of percent cell viability. Drug is considered cytotoxic when cell viability in the presence of drug was less than 80% of cell viability in the absence of drug.

| <b>Compound</b>     | <b>NTCP cell viability (%)</b> | <b>ASBT cell viability (%)</b> |
|---------------------|--------------------------------|--------------------------------|
| Irbesartan          | 97.8 $\pm$ 4.1                 | 99.0 $\pm$ 7.4                 |
| Cyclosporine A      | 92.1 $\pm$ 8.8                 | 100 $\pm$ 1.9                  |
| Ritonavir           | 101 $\pm$ 1                    | 100 $\pm$ 2.9                  |
| Bendroflumethiazide | 99.2 $\pm$ 6.3                 | 115 $\pm$ 3                    |
| Doxazosin           | 85.3 $\pm$ 31                  | 113 $\pm$ 5                    |
| Ezetimibe           | 87.8 $\pm$ 3.5                 | 110 $\pm$ 6                    |
| Simvastatin         | 93.3 $\pm$ 2.2                 | 123 $\pm$ 4                    |
| Nitrendipine        | 97.8 $\pm$ 3.6                 | 107 $\pm$ 6                    |
| Itraconazole        | 127 $\pm$ 10                   | 122 $\pm$ 9                    |
| Nimodipine          | 84.8 $\pm$ 7.1                 | 104 $\pm$ 32                   |
| Reserpine           | 135 $\pm$ 16                   | 141 $\pm$ 0                    |
| Ketoconazole        | 86.8 $\pm$ 12                  | 126 $\pm$ 6                    |
| Isradipine          | 85.8 $\pm$ 5.4                 | 133 $\pm$ 0.4                  |
| Rosuvastatin        | 106 $\pm$ 10                   | 117 $\pm$ 3                    |
| Nefazodone          | 93.5 $\pm$ 1.2                 | 129 $\pm$ 9                    |
| Losartan            | 95.4 $\pm$ 36                  | 106 $\pm$ 2                    |
| Nateglinide         | 100 $\pm$ 4                    | 108 $\pm$ 8                    |
| Sulconazole         | 123 $\pm$ 6                    | 169 $\pm$ 0                    |
| Indomethacin        | 98.8 $\pm$ 7.0                 | 131 $\pm$ 1                    |
| Nifedipine          | 97.9 $\pm$ 3.6                 | 84.5 $\pm$ 1.4                 |

|                    |                       |                       |
|--------------------|-----------------------|-----------------------|
| Candesartan        | 96.3 <sub>±</sub> 5.8 | 88.9 <sub>±</sub> 3.8 |
| Cerivastatin       | 112 <sub>±</sub> 11   | 126 <sub>±</sub> 7    |
| Tioconazole        | 122 <sub>±</sub> 7    | 107 <sub>±</sub> 21   |
| Lovastatin         | 96.9 <sub>±</sub> 5.5 | 144 <sub>±</sub> 3    |
| Fenofibrate        | 131 <sub>±</sub> 19   | 79.2 <sub>±</sub> 5.4 |
| Naproxen           | 89.8 <sub>±</sub> 2.1 | 137 <sub>±</sub> 7    |
| Sulfanilamide      | 80.6 <sub>±</sub> 6.8 | 143 <sub>±</sub> 1    |
| Methylprednisolone | 97.0 <sub>±</sub> 5.1 | 104 <sub>±</sub> 7    |
| Budesonide         | 86.1 <sub>±</sub> 30  | 126 <sub>±</sub> 5    |
| Prochlorperazine   | 83.3 <sub>±</sub> 2.6 | 91.6 <sub>±</sub> 1.3 |
| Furosemide         | 87.2 <sub>±</sub> 9.3 | 111 <sub>±</sub> 7    |
| Nicardipine        | 89.9 <sub>±</sub> 6.7 | 140 <sub>±</sub> 1    |
| Raloxifene HCl     | 166 <sub>±</sub> 31   | 80.4 <sub>±</sub> 8.0 |
| Cimetidine         | 97.0 <sub>±</sub> 24  | 117 <sub>±</sub> 3    |
| Prednisolone       | 89.2 <sub>±</sub> 8.3 | 153 <sub>±</sub> 5    |
| Chloroquine        | 95.1 <sub>±</sub> 3.3 | 120 <sub>±</sub> 8    |
| Ketoprofen         | 91.9 <sub>±</sub> 1.2 | 104 <sub>±</sub> 5    |
| Metronidazole      | 87.3 <sub>±</sub> 13  | 115 <sub>±</sub> 5    |
| Procainamide HCl   | 175 <sub>±</sub> 25   | 144 <sub>±</sub> 5    |
| Famotidine         | 97.8 <sub>±</sub> 9.6 | 120 <sub>±</sub> 3    |
| Propafenone HCl    | 85.8 <sub>±</sub> 3.9 | 129 <sub>±</sub> 6    |
| Triamterene        | 147 <sub>±</sub> 34   | 175 <sub>±</sub> 2    |
| Econazole          | 101 <sub>±</sub> 4    | 106 <sub>±</sub> 4    |
| Olmesartan         | 99.2 <sub>±</sub> 3.1 | 136 <sub>±</sub> 5    |
| Probenecid         | 91.0 <sub>±</sub> 2.8 | 130 <sub>±</sub> 2    |
| Diltiazem          | 92.4 <sub>±</sub> 4.2 | 120 <sub>±</sub> 6    |

|                |                       |                       |
|----------------|-----------------------|-----------------------|
| Ethosuximide   | 98.2 <sub>±</sub> 5.5 | 106 <sub>±</sub> 1    |
| Miconazole     | 92.0 <sub>±</sub> 31  | 113 <sub>±</sub> 6    |
| Imatinib       | 165 <sub>±</sub> 15   | 119 <sub>±</sub> 1    |
| Chlorpromazine | 94.3 <sub>±</sub> 5.3 | 102 <sub>±</sub> 8    |
| Abacavir       | 97.9 <sub>±</sub> 1.3 | 123 <sub>±</sub> 10   |
| Quinine        | 86.0 <sub>±</sub> 4.8 | 136 <sub>±</sub> 4    |
| Sulfinpyrazone | 104 <sub>±</sub> 9    | 83.3 <sub>±</sub> 1.5 |
| Nafcillin      | 80.6 <sub>±</sub> 6.3 | 91.1 <sub>±</sub> 11  |
| Acarbose       | 96.5 <sub>±</sub> 3.7 | 127 <sub>±</sub> 11   |
| Aztreonam      | 85.5 <sub>±</sub> 3.1 | 107 <sub>±</sub> 12   |
| Bortezomib     | 105 <sub>±</sub> 1    | 102 <sub>±</sub> 5    |
| Cefaclor       | 97.9 <sub>±</sub> 3.9 | 95.4 <sub>±</sub> 8.7 |
| Daunorubicin   | 108 <sub>±</sub> 10   | 124 <sub>±</sub> 3    |
| Dibucaine      | 101 <sub>±</sub> 10   | 130 <sub>±</sub> 1    |
| Eletriptan     | 96.3 <sub>±</sub> 2.0 | 83.9 <sub>±</sub> 0.3 |
| Enalapril      | 100 <sub>±</sub> 6    | 84.0 <sub>±</sub> 7.8 |
| Eprosartan     | 83.8 <sub>±</sub> 11  | 107 <sub>±</sub> 0    |
| Formoterol     | 95.6 <sub>±</sub> 9.6 | 102 <sub>±</sub> 14   |
| Omeprazole     | 101 <sub>±</sub> 4    | 131 <sub>±</sub> 8    |
| Oseltamivir    | 96.6 <sub>±</sub> 1.6 | 95.3 <sub>±</sub> 8.9 |
| Oxiconazole    | 90.5 <sub>±</sub> 0.2 | 140 <sub>±</sub> 9    |
| Ropinirole     | 102 <sub>±</sub> 8    | 92.2 <sub>±</sub> 16  |
| Thiothixene    | 103 <sub>±</sub> 8    | 136 <sub>±</sub> 8    |
| Valsartan      | 111 <sub>±</sub> 38   | 77.9 <sub>±</sub> 5.7 |
| Warfarin       | 105 <sub>±</sub> 4    | 135 <sub>±</sub> 6    |

**Table S10.** SAR of angiotensin II antagonists and mapping to pharmacophore.

| Compounds   | Est $K_i$ ( $\mu\text{M}$ ) | Chemical structure                                                                                                                                                                                                                                                                       | Pharmacophore mapping                                                                                                                                                                                                                                                         |
|-------------|-----------------------------|------------------------------------------------------------------------------------------------------------------------------------------------------------------------------------------------------------------------------------------------------------------------------------------|-------------------------------------------------------------------------------------------------------------------------------------------------------------------------------------------------------------------------------------------------------------------------------|
| Irbesartan  | 12.0 $\pm$ 1.6              | 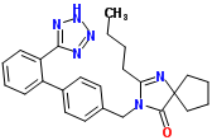 <p>Chemical structure of Irbesartan, showing a benzimidazole ring system connected to a cyclopentane ring via a propyl chain.</p>                                                                      |  <p>3D pharmacophore mapping of Irbesartan, showing the molecule's interaction with a receptor binding site. The pharmacophore features are highlighted with green and cyan spheres.</p>    |
| Losartan    | 105 $\pm$ 9                 |  <p>Chemical structure of Losartan, showing a benzimidazole ring system connected to a benzimidazole ring via a propyl chain, with a chlorine atom and a hydroxyl group on the benzimidazole ring.</p> |  <p>3D pharmacophore mapping of Losartan, showing the molecule's interaction with a receptor binding site. The pharmacophore features are highlighted with green and cyan spheres.</p>     |
| Candesartan | 145 $\pm$ 44                |  <p>Chemical structure of Candesartan, showing a benzimidazole ring system connected to a benzimidazole ring via a propyl chain, with a hydroxyl group on the benzimidazole ring.</p>                 |  <p>3D pharmacophore mapping of Candesartan, showing the molecule's interaction with a receptor binding site. The pharmacophore features are highlighted with green and cyan spheres.</p> |

|            |         |                                                                                                                                                                                                                                                                                                              |                                                                                                                                                                                                                                            |
|------------|---------|--------------------------------------------------------------------------------------------------------------------------------------------------------------------------------------------------------------------------------------------------------------------------------------------------------------|--------------------------------------------------------------------------------------------------------------------------------------------------------------------------------------------------------------------------------------------|
| Olmesartan | 422+204 | 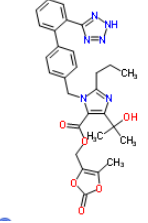 <p>Chemical structure of Olmesartan, showing a benzimidazole ring system connected to a butyl chain, which is further linked to a chiral center containing a hydroxyl group and a methyl group, and a propyl chain.</p>    |  <p>3D molecular model of Olmesartan, showing the spatial arrangement of atoms and the distribution of electron density represented by isosurfaces.</p>  |
| Eprosartan | 3000    |  <p>Chemical structure of Eprosartan, featuring a benzimidazole ring system connected to a propyl chain, which is further linked to a chiral center containing a hydroxyl group and a methyl group, and a propyl chain.</p> |  <p>3D molecular model of Eprosartan, showing the spatial arrangement of atoms and the distribution of electron density represented by isosurfaces.</p>  |
| Valsartan  | 3000    |  <p>Chemical structure of Valsartan, showing a benzimidazole ring system connected to a propyl chain, which is further linked to a chiral center containing a hydroxyl group and a methyl group, and a propyl chain.</p>  |  <p>3D molecular model of Valsartan, showing the spatial arrangement of atoms and the distribution of electron density represented by isosurfaces.</p> |

**Table S11.** NTCP binding features from Bayesian analysis. Both good and bad features are identified.

Good features from FCFP\_6

|                                                                                     |                                                                                     |                                                                                     |                                                                                      |                                                                                       |
|-------------------------------------------------------------------------------------|-------------------------------------------------------------------------------------|-------------------------------------------------------------------------------------|--------------------------------------------------------------------------------------|---------------------------------------------------------------------------------------|
| 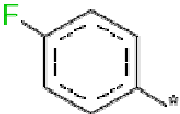   |    |    |    |    |
| G1: -1508180856<br>5 out of 5 good<br>Bayesian Score: 0.469                         | G2: 675769755<br>5 out of 5 good<br>Bayesian Score: 0.469                           | G3: 71476542<br>11 out of 12 good<br>Bayesian Score: 0.455                          | G4: -415245925<br>4 out of 4 good<br>Bayesian Score: 0.445                           | G5: 551850122<br>10 out of 11 good<br>Bayesian Score: 0.443                           |
|   |   |   |   |   |
| G6: -745491832<br>10 out of 11 good<br>Bayesian Score: 0.443                        | G7: 367998008<br>10 out of 11 good<br>Bayesian Score: 0.443                         | G8: -1306564371<br>3 out of 3 good<br>Bayesian Score: 0.411                         | G9: -581464307<br>3 out of 3 good<br>Bayesian Score: 0.411                           | G10: 358703399<br>3 out of 3 good<br>Bayesian Score: 0.411                            |
|  |  |  |  |  |
| G11: 1429752406<br>3 out of 3 good<br>Bayesian Score: 0.411                         | G12: -1482838277<br>3 out of 3 good<br>Bayesian Score: 0.411                        | G13: -964367925<br>3 out of 3 good<br>Bayesian Score: 0.411                         | G14: -1410079687<br>3 out of 3 good<br>Bayesian Score: 0.411                         | G15: -1282647855<br>3 out of 3 good<br>Bayesian Score: 0.411                          |
|  |  |  |  |  |
| G16: -855818135<br>3 out of 3 good<br>Bayesian Score: 0.411                         | G17: -428284881<br>3 out of 3 good<br>Bayesian Score: 0.411                         | G18: -358634557<br>3 out of 3 good<br>Bayesian Score: 0.411                         | G19: -243201427<br>3 out of 3 good<br>Bayesian Score: 0.411                          | G20: -1348349280<br>3 out of 3 good<br>Bayesian Score: 0.411                          |

Bad features from FCFP\_6

|                                                                                     |                                                                                     |                                                                                     |                                                                                      |                                                                                       |
|-------------------------------------------------------------------------------------|-------------------------------------------------------------------------------------|-------------------------------------------------------------------------------------|--------------------------------------------------------------------------------------|---------------------------------------------------------------------------------------|
| 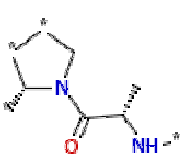   |    |    |    |    |
| B1:<br>393220684<br>0 out of 4 good<br>Bayesian Score: -1.164                       | B2:<br>395661789<br>0 out of 3 good<br>Bayesian Score: -0.976                       | B3:<br>327438754<br>0 out of 3 good<br>Bayesian Score: -0.976                       | B4:<br>307448885<br>0 out of 3 good<br>Bayesian Score: -0.976                        | B5:<br>2005402822<br>0 out of 3 good<br>Bayesian Score: -0.976                        |
|    |    |    |    |    |
| B6:<br>-1462709112<br>0 out of 3 good<br>Bayesian Score: -0.976                     | B7:<br>-1549103449<br>0 out of 3 good<br>Bayesian Score: -0.976                     | B8:<br>-387072142<br>0 out of 3 good<br>Bayesian Score: -0.976                      | B9:<br>1990630846<br>0 out of 2 good<br>Bayesian Score: -0.743                       | B10:<br>-1169541771<br>0 out of 2 good<br>Bayesian Score: -0.743                      |
|    |    |    |    |    |
| B11:<br>-332692398<br>0 out of 2 good<br>Bayesian Score: -0.743                     | B12:<br>-500811869<br>0 out of 2 good<br>Bayesian Score: -0.743                     | B13:<br>422052003<br>0 out of 2 good<br>Bayesian Score: -0.743                      | B14:<br>-1946918893<br>0 out of 2 good<br>Bayesian Score: -0.743                     | B15:<br>1551488525<br>0 out of 2 good<br>Bayesian Score: -0.743                       |
|  |  |  |  |  |
| B16:<br>1047966709<br>0 out of 2 good<br>Bayesian Score: -0.743                     | B17:<br>1691645163<br>0 out of 2 good<br>Bayesian Score: -0.743                     | B18:<br>31138034<br>0 out of 2 good<br>Bayesian Score: -0.743                       | B19:<br>32341455<br>0 out of 2 good<br>Bayesian Score: -0.743                        | B20:<br>-921300997<br>0 out of 2 good<br>Bayesian Score: -0.743                       |



**Table S12.** Percent taurocholate uptake at the highest drug concentration evaluated. Nine compounds reduced taurocholate uptake below 50%. Compounds are listed in same order at Table 5.

| <b>Compound</b>     | <b>Percent taurocholate uptake <sup>a</sup></b> |
|---------------------|-------------------------------------------------|
| Cyclosporine A      | 24.0±1.9                                        |
| Irbesartan          | 7.4±0.7                                         |
| Ritonavir           | 27.0±1.2                                        |
| Bendroflumethiazide | 28.3±2.2                                        |
| Doxazosin           | 58.1±1.9                                        |
| Ezetimibe           | 43.1±1.7                                        |
| Simvastatin         | 31.8±1.1                                        |
| Nitrendipine        | 75.2±0.4                                        |
| Nimodipine          | 63.2±1.9                                        |
| Ketoconazole        | 59.1±3.0                                        |
| Nefazodone          | 38.2±5.6                                        |
| Rosuvastatin        | 51.8±2.8                                        |
| Losartan            | 36.1±1.8                                        |
| Nateglinide         | 72.9±4.5                                        |
| Indomethacin        | 51.4±0.6                                        |
| Nifedipine          | 43.3±2.1                                        |
| Candesartan         | 67.3±3.5                                        |
| Tioconazole         | 82.1±6.0                                        |
| Fenofibrate         | 65.5±6.3                                        |
| Methylprednisolone  | 67.3±1.1                                        |
| Budesonide          | 61.4±3.1                                        |

|                  |                |
|------------------|----------------|
| Prochlorperazine | 63.6 $\pm$ 3.5 |
| Raloxifene HCl   | 91.9 $\pm$ 2.7 |
| Ketoprofen       | 74.0 $\pm$ 5.7 |
| Olmesartan       | 70.9 $\pm$ 0.3 |
| Probenecid       | 75.2 $\pm$ 3.4 |
| Diltiazem        | 74.0 $\pm$ 0.5 |

<sup>a</sup> Compound concentrations were 50 $\mu$ M (cyclosporine A, doxazosin, ezetimibe, nitrendipine, tioconazole, raloxifene HCl), 100 $\mu$ M (ritonavir, ketoconazole, nateglinide, Fenofibrate), 200 $\mu$ M (irbesartan, bendroflumethiazide, simvastatin, nimodipine, nefazodone, rosuvastatin, losartan, indomethacin, nifedipine, candesartan, methylprednisolone, budesonide, prochlorperazine, olmesartan), or 250 $\mu$ M (ketoprofen, probenecid, diltiazem).

**Figure S1.** Uptake of taurocholate into NTCP-HEK293 cells. In NTCP transfected cells with sodium, taurocholate uptake exhibited nonlinear kinetics. In the absence of sodium, uptake into NTCP transfected cells was low and linear. Curves are simultaneous fits to a) the Michaelis-Menten model with a passive uptake component and b) the passive uptake component only. Fitted kinetic parameters were:  $K_m = 22.7(\pm 3.4) \mu\text{M}$ ,  $V_{\text{max}} = 1.80(\pm 0.03) \text{ pmol/sec/cm}^2$ , and passive permeability  $P_p = 1.27(\pm 0.03) \times 10^{-6} \text{ cm/sec}$ . Also plotted are uptakes into mock-transfected HEK293 cells with and without sodium, which were low and similar to uptake into NTCP transfected cells without sodium.

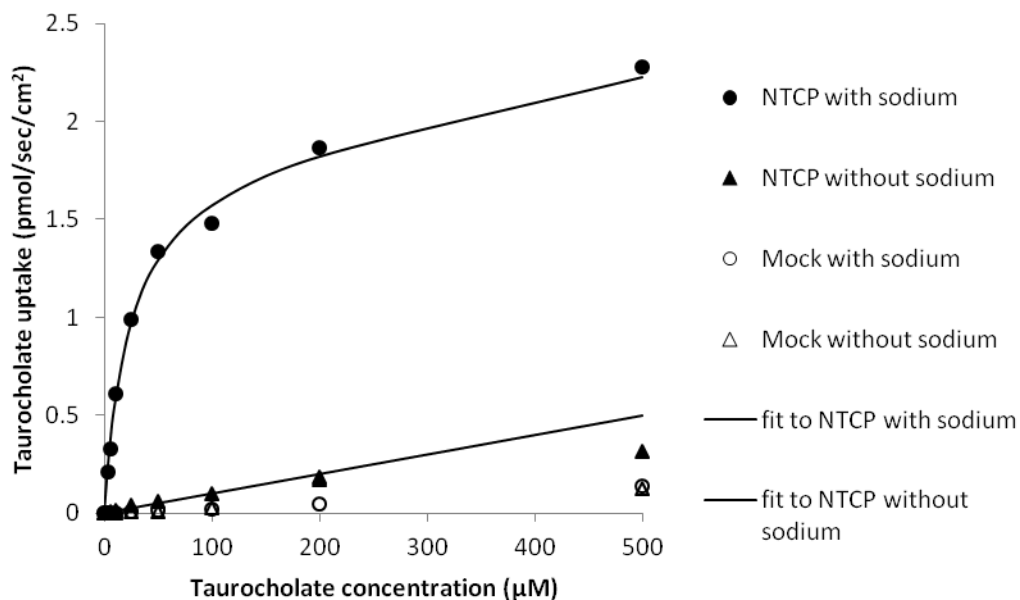

**Figure S2.** Correlation between ASBT inhibition and NTCP inhibition. The ASBT estimated  $K_i$  was plotted against NTCP estimated  $K_i$ . In panel A, all 72 drugs were plotted, including when  $K_i$  assigned a value of 3000  $\mu\text{M}$ . In panel B, only drugs with both estimated  $K_i$ 's less than 3000  $\mu\text{M}$  were plotted (i.e. lowers taurocholate uptake to 95% or less for each transporter). In panel C, only drugs with both estimated  $K_i$ 's less than 500  $\mu\text{M}$  were plotted.

Panel A of Figure S2

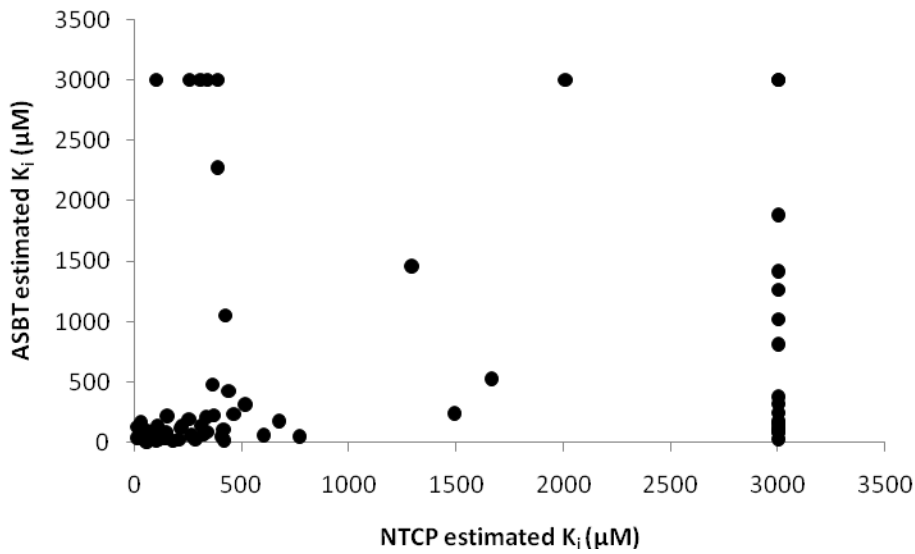

Panel B of Figure S2

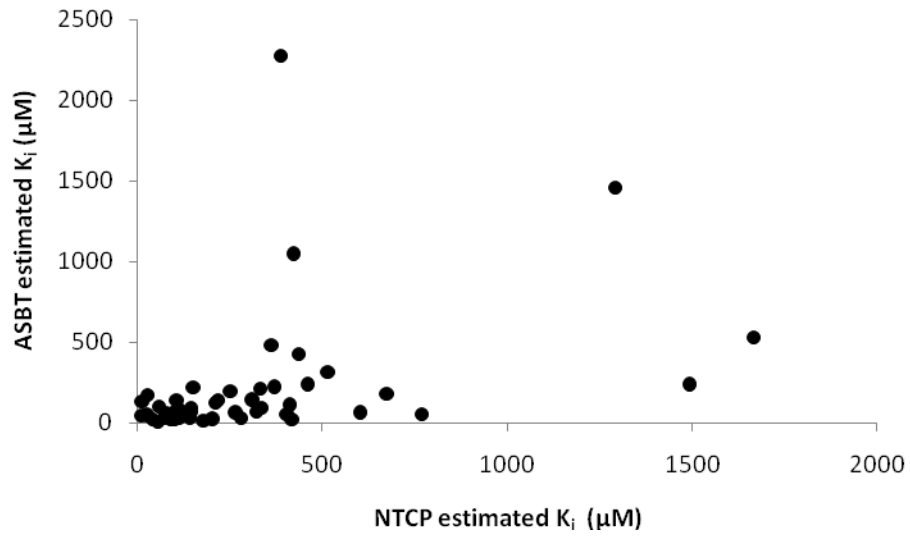

Panel C of Figure S2

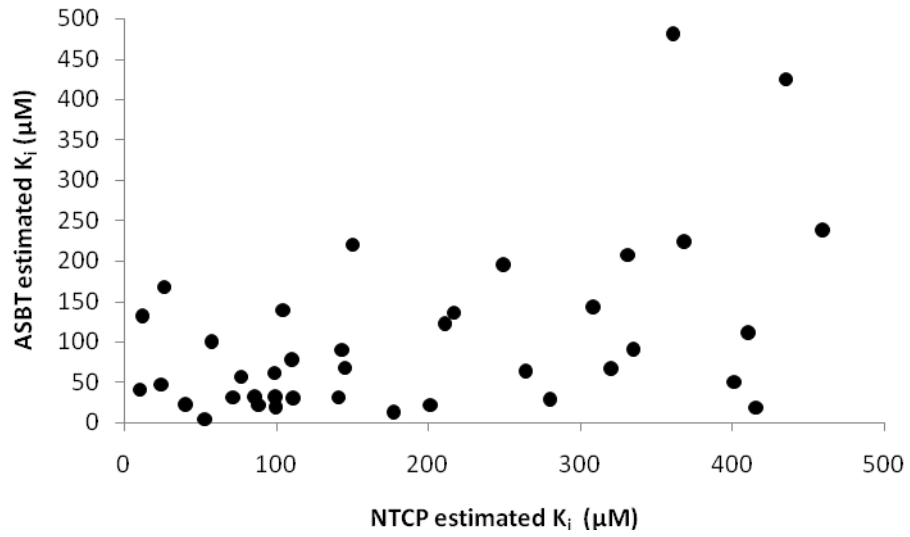

**Figure S3.** Correlation between NTCP observed  $K_i$  and estimated  $K_i$  for 27 drugs used in the common feature pharmacophore. Observed  $K_i$  employed data using seven drug concentrations that spanned 0-200  $\mu\text{M}$ . Estimated  $K_i$  was calculated from screening data (i.e. only one drug concentration). Linear regression yielded a slope of  $0.937 (\pm 0.104)$  and  $r^2=0.763$ .

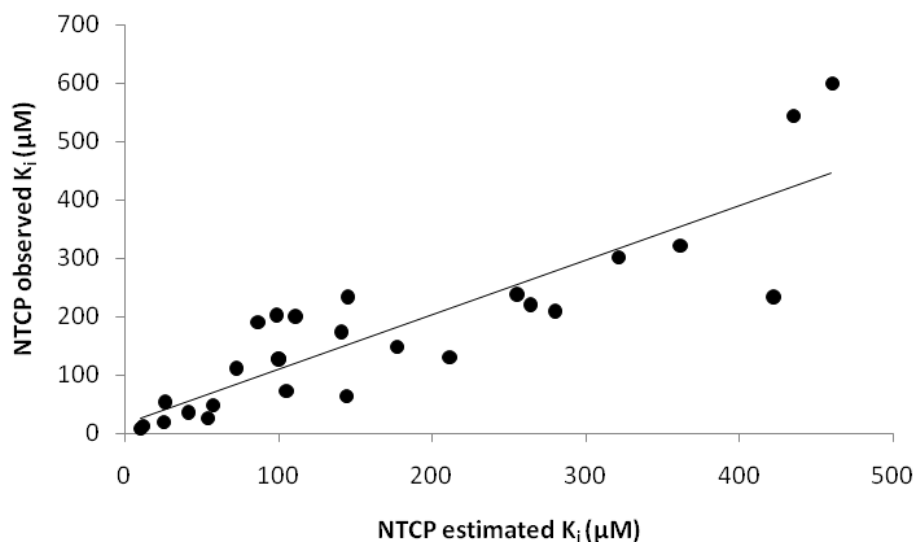

**Figure S4.** Principal component analysis of CDD FDA approved drug space (blue) and compounds tested against NTCP (yellow) using ALogP, molecular weight, number of H-bond donors, number of H-bond acceptors, number of rotatable bonds, number of rings, number of aromatic rings and molecular fractional polar surface area calculated with Discovery Studio 3.5. Three principal components explain 81.3% of the variance.

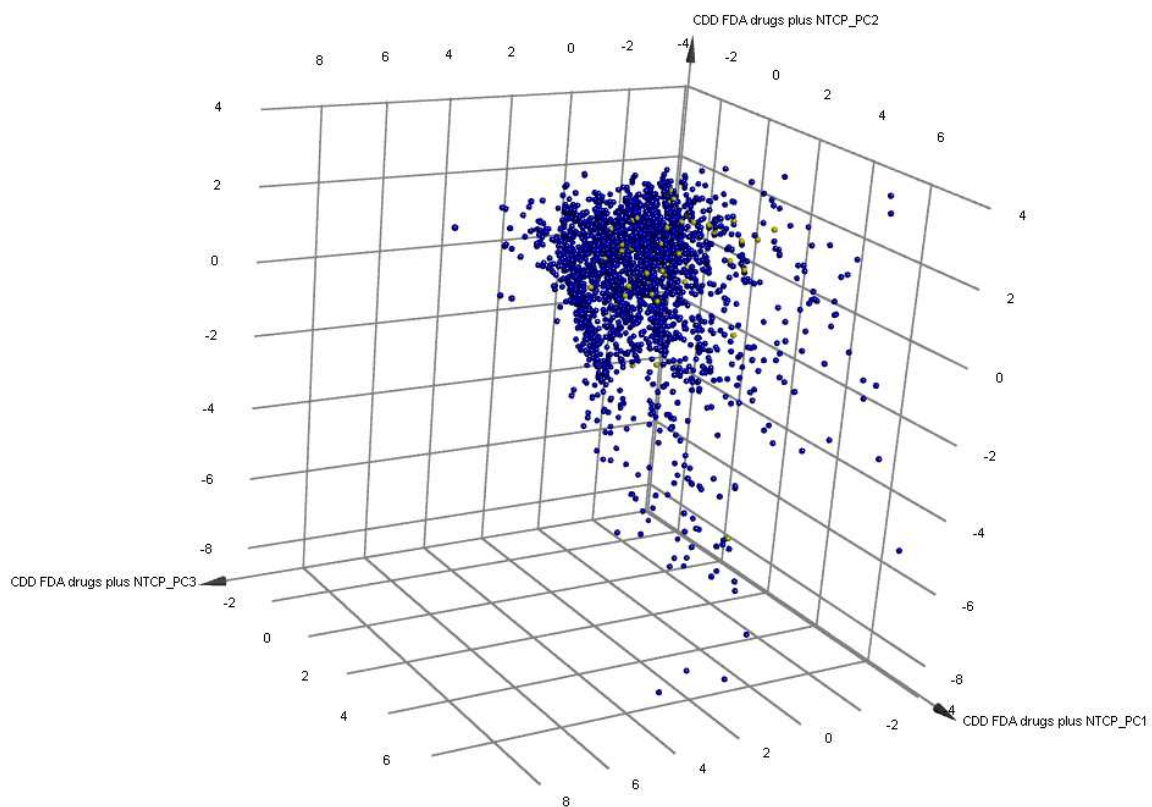

**Figure S5.** Cyclosporine A and ritonavir were mapped to common feature pharmacophore without ezetimibe shape. In panel A, cyclosporine A was mapped to the pharmacophore after the ezetimibe shape was removed. The fit value of the cyclosporine A was 0.45. In panel B, ritonavir was mapped to the pharmacophore after removing the ezetimibe shape. The fit value of the ritonavir was 2.08.

Panel A of Figure S5

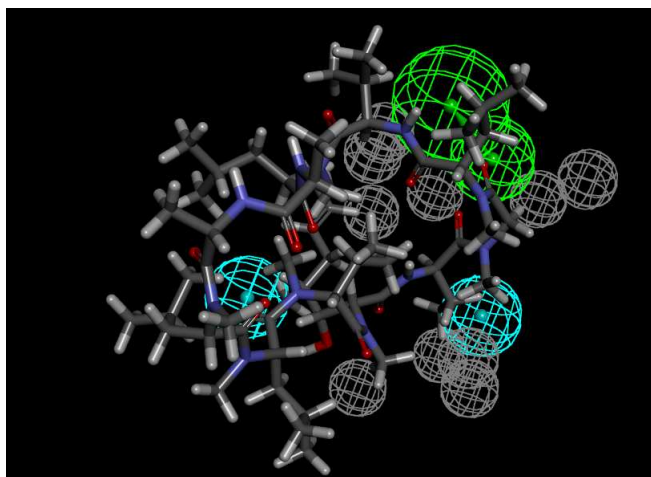

Panel B of Figure S5

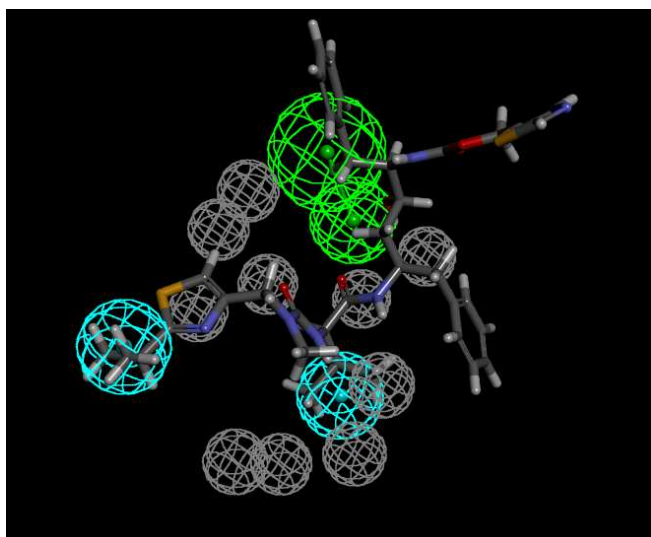

Supplement: NIHMS439676-supplement-1_si_001.pdf [file NIHMS439676-supplement-1_si_001.pdf]
